# Supplementary material for: Genomic Diversity and Introgression in O. sativa Reveal the Impact of Domestication and Breeding on the Rice Genome
Source: PubMed Central journal article supplement (PMC2875394; doi:10.1371/journal.pone.0010780), 2010-05-24

# Fst between Indica and Japonica

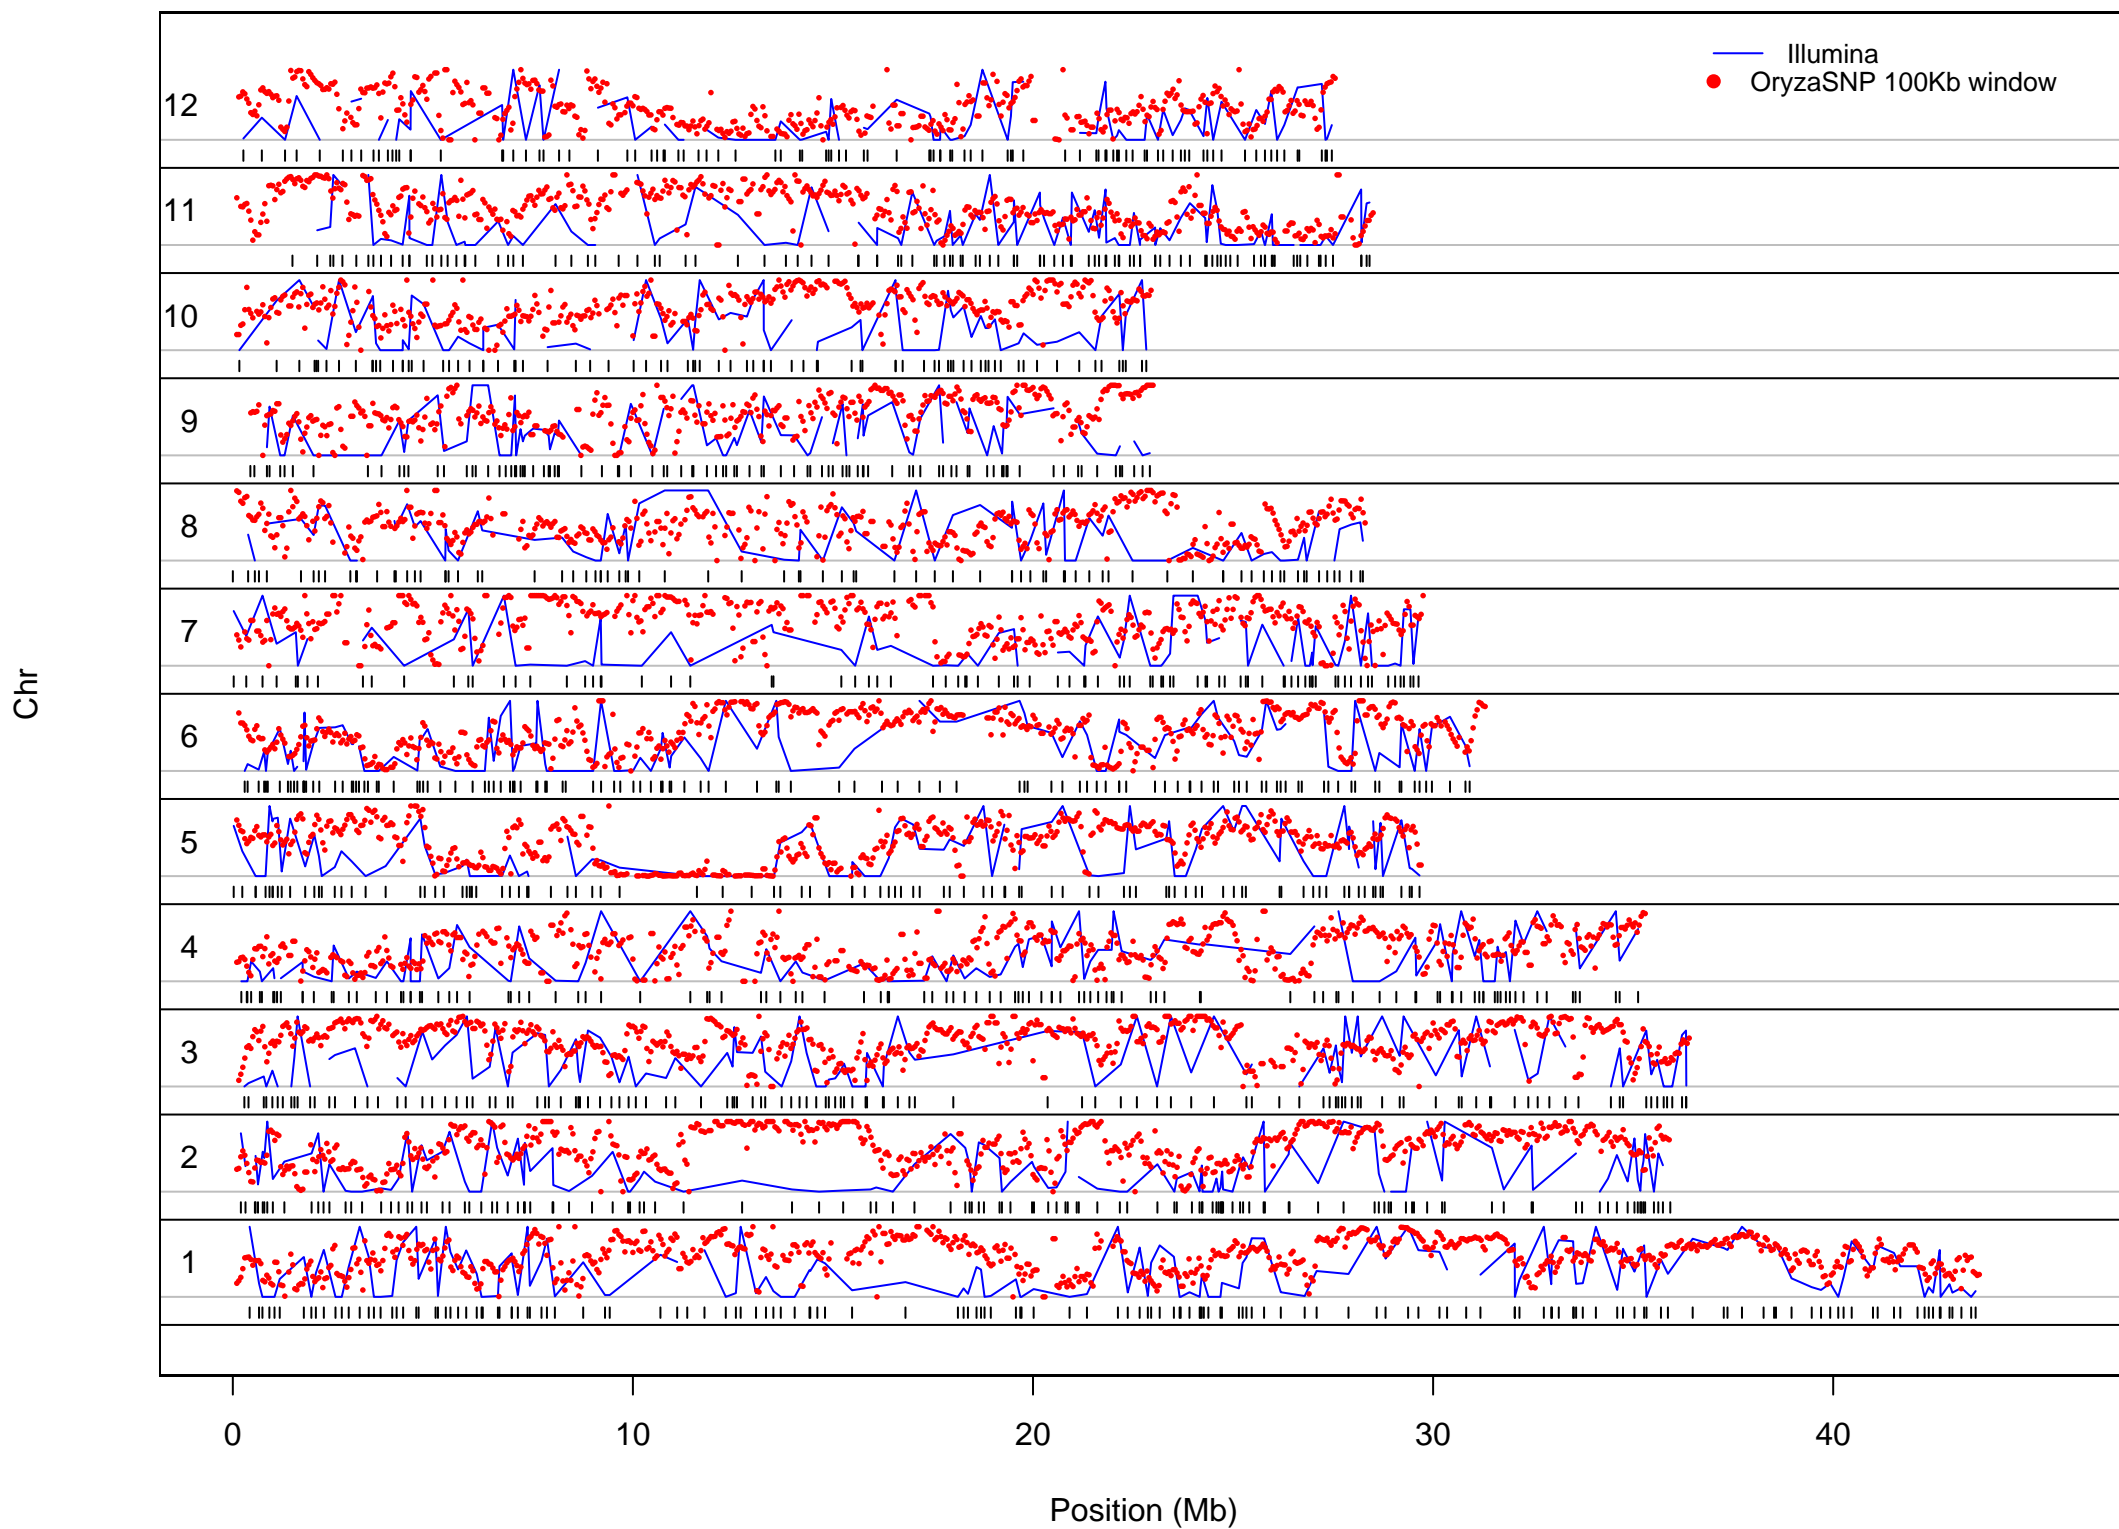

Supplement: pone.0010780.s002.pdf [file pone.0010780.s002.pdf]
