# Supplementary material for: Genomic Diversity and Introgression in O. sativa Reveal the Impact of Domestication and Breeding on the Rice Genome
Source: PLoS One. 2010 May 24;5(5):e10780. doi: 10.1371/journal.pone.0010780 (PMC2875394; doi:10.1371/journal.pone.0010780)
Supplement: Table S1 — Sample information and subpopulation assignment when K = 5 and phenotypic information. (0.11 MB XLS) [file pone.0010780.s008.xls]

## Sheet: Sample information
Supplementary Table S1. Sample information and subpopulation assignment when K= 5 and phenotypic information.
GSOR	Publication Name	Publication Country	NSFTVid	SubPop assignment (K =5 )	GroupV	IND	AUS	TEJ	TRJ	HULLED SEED LENGTH	Amylose Content
301001	Agostano	Italy	1	TEJ	0.0001	0.0001	0.0001	0.9994	0.0003	8.06412	16
301002	Aichi Asahi	Japan	2	TEJ	0.0001	0.0001	0.0001	0.9996	0.0002	7.57022	23.511
301003	Ai-Chiao-Hong	China	3	IND	0.0001	0.9993	0.0003	0.0001	0.0002	7.70538	23
301004	NSF-TV 4	Unknown	4	AUS	0.0002	0.1028	0.8964	0.0002	0.0005	8.23757	24
301005	NSF-TV 5	Unknown	5	GroupV	0.9995	0.0001	0.0001	0.0001	0.0002	9.70937	20
301006	ARC 7229	India	6	AUS	0.0003	0.123	0.8755	0.0003	0.0009	7.11818	24
301007	Arias	Indonesia	7	TRJ	0.0493	0.0086	0.0114	0.0126	0.918	7.34725	20
301008	Asse Y Pung	Philippines	8	TRJ	0.086	0.0003	0.0003	0.0005	0.9129	8.57209	23
301009	Baber	India	9	ADMIX	0.2722	0.0006	0.0005	0.6965	0.0303	7.67988	24
301010	Baghlani Nangarhar	Afghanistan	10	TEJ	0.0001	0.0001	0.0001	0.9996	0.0002	7.29712	16.388
301382	Baguamon 15	Bangladesh	11	IND	0.0003	0.8814	0.1179	0.0002	0.0003	8.13877	20.299
301011	Basmati	Pakistan	12	GroupV	0.9961	0.0008	0.0021	0.0003	0.0007	8.76144	23
301012	NSF-TV 13	Unknown	13	AUS	0.0003	0.0007	0.9986	0.0002	0.0003	8.36956	27
301383	Beonjo	South Korea	15	TEJ	0.0001	0.0001	0.0001	0.9995	0.0002	7.4722	16.736
301014	Bico Branco	Brazil	16	GroupV	0.9994	0.0001	0.0002	0.0002	0.0002	9.96496	22
301015	Binulawan	Philippines	17	IND	0.0007	0.9561	0.0005	0.0423	0.0004	7.60752	13.8165
301016	BJ 1	India	18	AUS	0.0002	0.0017	0.9976	0.0002	0.0003	7.65812	27
301017	Black Gora	India	19	AUS	0.0001	0.0012	0.9983	0.0001	0.0003	8.07532	24
301018	Blue Rose	United States	20	ADMIX	0.0001	0.0001	0.0001	0.4686	0.5311	8.20916	18
301019	Byakkoku Y 5006 Seln	Australia	21	IND	0.0003	0.9984	0.0004	0.0003	0.0007	7.10389	24
301020	Caawa/Fortuna 6-103-15	Taiwan	22	TRJ	0.0004	0.0002	0.0001	0.0003	0.999	8.75513	22.892
301021	Canella De Ferro	Brazil	23	TRJ	0.0001	0.0001	0.0001	0.0002	0.9994	8.62453	23
301022	Carolina Gold	United States	24	TRJ	0.0001	0.0001	0.0001	0.0002	0.9996	9.6739	23
301023	Carolina Gold	United States	25	TRJ	0.0001	0.0001	0.0001	0.0002	0.9995	8.81609	25
301024	Carolina Gold Sel	United States	26	TRJ	0.0001	0.0001	0.0001	0.0001	0.9996	9.63636	23
301025	NSF-TV 27	Unknown	27	TRJ	0.0001	0.0002	0.0002	0.0002	0.9993	10.1823	17
301026	Champa Tong 54	Thailand	28	AUS	0.0003	0.001	0.998	0.0003	0.0004	8.8551	23
301027	Chau	Vietnam	29	IND	0.0002	0.9982	0.0011	0.0002	0.0003	7.8074	NA
301030	Chodongji	South Korea	32	TEJ	0.0005	0.0003	0.0004	0.9979	0.0008	6.81933	18
301032	NSF-TV 34	Unknown	34	IND	0.0005	0.8673	0.1316	0.0003	0.0003	7.4407	NA
301033	CO18	India	35	IND	0.0002	0.8542	0.1452	0.0002	0.0002	7.16223	23.861
301035	Cuba 65	Cuba	37	TRJ	0.0005	0.0546	0.0032	0.0297	0.912	9.258	22
301037	NSF-TV 39	Unknown	39	ADMIX	0.0002	0.3177	0.6817	0.0002	0.0002	9.15961	26
301038	Dam	Thailand	40	ADMIX	0.3342	0.0003	0.0003	0.1883	0.4769	8.22234	0
301039	Darmali	Nepal	41	ADMIX	0.4514	0.0009	0.1013	0.2915	0.155	6.78221	NA
301040	Dee Geo Woo Gen	Taiwan	43	IND	0.0001	0.9995	0.0002	0.0001	0.0002	7.577	27
301041	Dhala Shaitta	Bangladesh	44	AUS	0.0001	0.0005	0.9992	0.0001	0.0002	8.41256	25
301042	Dom Sufid	Iran	45	GroupV	0.9994	0.0001	0.0001	0.0002	0.0002	9.44727	20
301043	Dourado Agulha	Brazil	46	TRJ	0.0001	0.0001	0.0001	0.0002	0.9995	9.8472	23
301045	DV85	Bangladesh	49	AUS	0.0001	0.0004	0.9991	0.0001	0.0002	7.14736	27
301046	DZ78	Bangladesh	50	AUS	0.0001	0.0004	0.9993	0.0001	0.0001	7.65299	25
301047	Early Wataribune	Japan	51	TEJ	0.0001	0.0001	0.0001	0.9996	0.0002	7.36546	18
301048	Eh Ia Chiu	Taiwan	52	ADMIX	0.4167	0.0013	0.0008	0.5783	0.003	6.7088	NA
301049	Firooz	Iran	53	GroupV	0.9994	0.0001	0.0001	0.0001	0.0002	9.8331	22
301050	Fortuna	United States	54	TRJ	0.0007	0.0002	0.0002	0.0008	0.9981	9.47736	24
301051	Gerdeh	Iran	55	ADMIX	0.5055	0.0002	0.0002	0.4931	0.001	8.93616	17
301052	Geumobyeo	South Korea	56	TEJ	0.0002	0.0001	0.0001	0.9993	0.0004	7.16486	NA
301053	NSF-TV 57	Unknown	57	IND	0.0001	0.9992	0.0004	0.0001	0.0002	7.33173	24
301054	Ghati Kamma Nangarhar	Afghanistan	58	AUS	0.0002	0.0008	0.9984	0.0003	0.0003	7.91452	27
301055	Gogo Lempuk	Indonesia	59	ADMIX	0.2041	0.0006	0.0004	0.0765	0.7183	7.27047	19
301056	Gotak Gatik	Indonesia	60	ADMIX	0.0033	0.0006	0.0003	0.6988	0.2971	7.83954	19
301057	Guan-Yin-Tsan	China	61	IND	0.0002	0.9988	0.0004	0.0003	0.0004	7.9208	26
301386	Gyehwa 3	South Korea	62	TEJ	0.0008	0.037	0.0005	0.9565	0.0052	8.59187	18.953
301387	Haginomae Mochi	Japan	63	TEJ	0.0001	0.0001	0.0001	0.9996	0.0002	6.89065	1.292
301388	Heukgyeong	South Korea	64	TEJ	0.0009	0.0002	0.0002	0.998	0.0007	6.67155	0.378
301058	Honduras	Honduras	65	TRJ	0.0001	0.0001	0.0001	0.0001	0.9996	9.70792	25
301059	Hsia Chioh Keh Tu	Taiwan	66	IND	0.0003	0.9915	0.0023	0.0018	0.0041	NA	21.477
301060	Hu Lo Tao	China	67	TEJ	0.0149	0.0003	0.0004	0.9834	0.001	7.43863	NA
301062	IAC 25	Brazil	69	TRJ	0.0001	0.0001	0.0001	0.0002	0.9995	9.30448	22
301063	Iguape Cateto	Haiti	70	TRJ	0.0001	0.0001	0.0001	0.0002	0.9995	8.63947	22
301064	IR 36	Philippines	71	IND	0.0011	0.996	0.0021	0.0004	0.0004	7.99648	24
301065	IR 8	Philippines	72	IND	0.0001	0.9994	0.0003	0.0001	0.0002	8.41835	24
301066	IRAT 177	French Guiana	73	TRJ	0.0001	0.0001	0.0002	0.0002	0.9994	9.89739	16
301067	IRGA 409	Brazil	74	IND	0.0005	0.9964	0.0014	0.0005	0.0011	9.52303	26
301068	Jambu	Indonesia	75	ADMIX	0.2135	0.1479	0.0006	0.001	0.637	7.99124	20
301069	Jaya	India	76	IND	0.0001	0.9995	0.0002	0.0001	0.0001	8.55649	26
301070	JC149	India	77	IND	0.0003	0.9446	0.0543	0.0003	0.0005	7.36634	24
301071	Jhona 349	India	78	AUS	0.0001	0.0002	0.9994	0.0001	0.0001	9.18047	27
301072	Jouiku 393G	Japan	79	ADMIX	0.0001	0.0002	0.0001	0.7656	0.2341	8.55892	14
301073	K 65	Suriname	80	ADMIX	0.1826	0.3087	0.1726	0.0009	0.3352	9.08107	26
301074	Kalamkati	India	81	AUS	0.0001	0.0002	0.9994	0.0001	0.0001	9.49555	26
301075	Kamenoo	Japan	83	TEJ	0.0001	0.0001	0.0001	0.9994	0.0003	6.93865	15
301076	Kaniranga	Indonesia	84	ADMIX	0.1627	0.0003	0.0003	0.0386	0.7982	7.85708	21
301077	Kasalath	India	85	AUS	0.0012	0.0034	0.9937	0.0004	0.0014	7.37873	26
301079	Keriting Tingii	Indonesia	87	ADMIX	0.3256	0.0003	0.0004	0.1881	0.4856	8.61393	0
301080	Khao Gaew	Thailand	88	AUS	0.0002	0.0861	0.9131	0.0002	0.0004	7.24951	25
301081	NSF-TV 89	Unknown	89	TRJ	0.0011	0.0002	0.0003	0.0008	0.9975	6.79489	24
301083	Kibi	Japan	91	TEJ	0.0001	0.0001	0.0001	0.9995	0.0002	6.95335	17.506
301084	Kinastano	Philippines	92	TRJ	0.0001	0.0001	0.0001	0.0002	0.9996	7.97268	23
301085	Kitrana 508	Madagascar	93	GroupV	0.9994	0.0001	0.0001	0.0002	0.0002	9.46873	17
301086	Koshihikari	Japan	94	TEJ	0.0001	0.0001	0.0001	0.9996	0.0002	7.32411	16
301088	KU115	Thailand	96	ADMIX	0.1975	0.0002	0.0002	0.1442	0.6579	8.394	13
301091	LAC 23	Liberia	99	TRJ	0.0002	0.0002	0.0001	0.0002	0.9993	9.58327	23
301092	Lacrosse	United States	100	ADMIX	0.0001	0.0001	0.0001	0.5377	0.4619	8.13803	14
301093	Lemont	United States	101	TRJ	0.0004	0.0065	0.0047	0.0009	0.9875	9.63239	23
301095	Luk Takhar	Afghanistan	103	TEJ	0.0006	0.0104	0.0036	0.9829	0.0026	7.52808	17
301097	Mehr	Iran	105	AUS	0.0002	0.1188	0.8803	0.0002	0.0005	7.61404	25
301098	Ming Hui	China	106	IND	0.0014	0.9326	0.0538	0.004	0.0082	9.4203	18.5
301099	NSF-TV 107	Unknown	107	TRJ	0.0001	0.0001	0.0001	0.0002	0.9996	9.94304	19
301100	Moroberekan	Guinea	108	ADMIX	0.2071	0.0003	0.0002	0.0011	0.7912	9.03737	NA
301101	MTU9	India	109	ADMIX	0.0002	0.7844	0.2149	0.0002	0.0003	7.62321	23.764
301102	Mudgo	India	110	IND	0.0002	0.8692	0.1302	0.0002	0.0002	8.7916	25
301104	N12	India	112	GroupV	0.895	0.0004	0.104	0.0002	0.0004	8.7536	NA
301105	Norin 20	Japan	113	TEJ	0.0002	0.0001	0.0001	0.9994	0.0002	7.33264	14
301106	Nova	United States	114	ADMIX	0.0001	0.0001	0.0001	0.4124	0.5872	8.13785	14
301107	NPE 835	Pakistan	115	ADMIX	0.3112	0.0003	0.0006	0.6834	0.0046	8.02333	NA
301108	NSF-TV 116	Unknown	116	TRJ	0.0002	0.0002	0.0001	0.0002	0.9993	9.16494	24
301109	O-Luen-Cheung	Taiwan	117	IND	0.0001	0.9993	0.0003	0.0001	0.0002	7.89767	0
301110	Oro	Chile	118	TEJ	0.0002	0.0001	0.0001	0.9994	0.0003	7.85437	NA
301111	Oryzica Llanos 5	Colombia	119	IND	0.0019	0.8359	0.0005	0.0112	0.1505	9.93789	21
301112	OS6	Nigeria	120	TRJ	0.0003	0.0002	0.0002	0.0003	0.999	9.16714	23
301113	Ostiglia	Argentina	121	ADMIX	0.0001	0.0001	0.0001	0.7994	0.2002	7.50465	16
301114	Padi Kasalle	Indonesia	122	ADMIX	0.1983	0.0014	0.0005	0.1375	0.6624	7.65008	22
301115	Pagaiyahan	Taiwan	123	IND	0.0001	0.9992	0.0004	0.0001	0.0002	7.51109	24
301390	Pankhari 203	India	124	GroupV	0.9957	0.0007	0.0031	0.0002	0.0002	8.9251	23.274
301116	Pao-Tou-Hung	China	125	IND	0.0001	0.9993	0.0003	0.0001	0.0002	8.21218	23
301117	Pappaku	Taiwan	126	IND	0.0002	0.9979	0.0013	0.0003	0.0003	7.45094	25
301119	Pato De Gallinazo	Australia	128	ADMIX	0.0002	0.0001	0.0001	0.6718	0.3278	7.70395	16
301120	Peh-Kuh	Taiwan	129	IND	0.0001	0.9992	0.0004	0.0001	0.0002	7.63328	26
301121	Peh-Kuh-Tsao-Tu	Taiwan	130	IND	0.0001	0.9992	0.0004	0.0001	0.0002	7.54458	23
301122	Phudugey	Bhutan	131	AUS	0.0001	0.0004	0.9992	0.0001	0.0002	8.34764	27
301123	Rathuwee	Sri Lanka	132	IND	0.0051	0.9671	0.0133	0.0013	0.0132	8.32576	26
301124	Rikuto Kemochi	Japan	133	ADMIX	0.0941	0.0002	0.0002	0.7589	0.1465	7.32223	0
301125	Romeo	Italy	134	ADMIX	0.0003	0.0001	0.0001	0.7931	0.2063	8.64614	15
301126	RT 1031-69	Zaire	135	TRJ	0.0001	0.0002	0.0002	0.0002	0.9994	9.05437	19
301128	RTS14	Vietnam	137	IND	0.0001	0.9992	0.0004	0.0001	0.0002	8.11602	22
301129	RTS4	Vietnam	138	IND	0.0002	0.8499	0.1495	0.0002	0.0002	7.21272	23.368
301130	S4542A3-49B-2B12	United States	139	TRJ	0.0003	0.0007	0.0009	0.0046	0.9936	9.04751	22
301131	Saturn	United States	140	ADMIX	0.0002	0.0001	0.0001	0.238	0.7615	8.25115	13
301132	Seratoes Hari	Indonesia	141	IND	0.0038	0.9552	0.0398	0.0004	0.0008	8.07528	23
301133	Shai-Kuh	China	142	IND	0.0005	0.9612	0.0029	0.0109	0.0245	8.16112	24
301134	Shinriki	Japan	143	TEJ	0.0001	0.0001	0.0001	0.9997	0.0001	7.375	17
301135	Shoemed	United States	144	TEJ	0.0001	0.0001	0.0001	0.9996	0.0002	7.47326	17.913
301136	Short Grain	Thailand	145	IND	0.0002	0.9376	0.0541	0.0003	0.0077	8.73453	22
301137	Shuang-Chiang	Taiwan	146	IND	0.0004	0.9685	0.03	0.0005	0.0006	NA	NA
301138	Sinampaga Selection	Philippines	147	TRJ	0.0009	0.0011	0.0004	0.0032	0.9944	7.85197	22
301139	Sintane Diofor	Burkina Faso	148	ADMIX	0.001	0.7988	0.1959	0.0015	0.0028	NA	23.52
301140	Sinaguing	Philippines	149	TRJ	0.0004	0.0002	0.0002	0.0005	0.9988	9.35232	23
301141	Sultani	Egypt	150	TRJ	0.0002	0.0001	0.0001	0.1889	0.8107	8.27242	15
301142	Suweon	Korea	151	TEJ	0.0012	0.0008	0.0008	0.9966	0.0006	7.4139	15
301143	T 1	India	152	AUS	0.0001	0.0003	0.9994	0.0001	0.0001	9.39482	27
301144	T26	India	153	AUS	0.0001	0.0002	0.9995	0.0001	0.0001	9.49688	27
301145	Ta Hung Ku	China	154	TEJ	0.0075	0.0004	0.0003	0.8483	0.1435	8.56816	18
301146	Ta Mao Tsao	China	155	TEJ	0.1093	0.0003	0.0004	0.8854	0.0046	7.51936	18
301147	Taichung Native 1	Taiwan	156	IND	0.0001	0.9994	0.0002	0.0001	0.0002	7.38931	24
301148	Tainan Iku 487	Taiwan	157	TEJ	0.0018	0.0004	0.0002	0.9923	0.0054	7.3989	18
301149	Taipei 309	Taiwan	158	TEJ	0.0001	0.0001	0.0001	0.9996	0.0002	6.95112	NA
301150	Tam Cau 9A	Vietnam	159	IND	0.0005	0.9452	0.0537	0.0003	0.0004	7.7371	NA
301151	NSF-TV 160	Unknown	160	GroupV	0.9945	0.0002	0.0002	0.0047	0.0004	8.37748	18
301152	TeQing	China	161	IND	0.0001	0.999	0.0003	0.0003	0.0003	7.68301	22
301153	TKM6	India	162	IND	0.0014	0.9477	0.0502	0.0003	0.0004	8.09212	NA
301154	Taducan	Philippines	163	IND	0.0006	0.9324	0.0359	0.0102	0.0209	7.76107	26
301155	Tondok	Indonesia	164	ADMIX	0.2327	0.0007	0.0004	0.0283	0.7379	8.87523	21
301156	Trembese	Indonesia	165	TRJ	0.1495	0.0009	0.0005	0.0134	0.8357	7.70148	19
301157	Tsipala 421	Madagascar	166	ADMIX	0.0003	0.6458	0.3519	0.0004	0.0015	8.77615	28
301158	B6616A4-22-Bk-5-4	United States	167	TRJ	0.0003	0.0002	0.0002	0.036	0.9634	9.16464	22
301159	Vary Vato 462	Madagascar	168	ADMIX	0.0006	0.6087	0.3896	0.0004	0.0008	8.78298	28
301160	WC 6	China	169	ADMIX	0.2161	0.0003	0.0003	0.5996	0.1839	10.5677	0
301161	Wells	United States	170	TRJ	0.0015	0.0019	0.0553	0.0041	0.9371	9.30983	22.851
301162	ZHE 733	China	171	IND	0.0001	0.999	0.0005	0.0002	0.0002	8.88039	25
301163	Zhenshan 2	China	172	IND	0.0013	0.9598	0.0003	0.0371	0.0015	7.87737	21
301165	Azucena	Philippines	174	TRJ	0.0794	0.0005	0.0017	0.0016	0.9168	9.85433	22
301167	583	Ecuador	176	TRJ	0.0002	0.0001	0.0001	0.0003	0.9993	9.09914	22
301168	68-2	France	177	TEJ	0.0001	0.0001	0.0001	0.8773	0.1224	7.96026	13
301169	ARC 6578	India	178	AUS	0.0004	0.0902	0.9081	0.0004	0.001	6.7898	28
301170	Bellardone	France	179	TEJ	0.0001	0.0001	0.0001	0.9995	0.0002	7.48662	15
301171	Benllok	Peru	180	TEJ	0.0001	0.0001	0.0001	0.9997	0.0001	7.18838	18
301172	Bergreis	Austria	181	TEJ	0.0001	0.0001	0.0001	0.9996	0.0002	7.51978	19
301173	Blue Rose Supreme	United States	182	ADMIX	0.0001	0.0001	0.0001	0.4425	0.5572	8.54177	18
301174	Boa Vista	El Salvador	183	TRJ	0.0001	0.0001	0.0001	0.0002	0.9995	8.68663	23
301175	Bombon	Spain	184	ADMIX	0.0723	0.0003	0.0003	0.746	0.1811	7.36976	20
301177	Bul Zo	South Korea	186	TEJ	0.0001	0.0001	0.0001	0.9993	0.0003	7.43367	17
301178	C57-5043	United States	187	TRJ	0.0001	0.0002	0.0001	0.1875	0.812	9.69063	20
301179	Coppocina	Bulgaria	188	TRJ	0.0084	0.0005	0.0003	0.0014	0.9894	7.40925	23
301180	Criollo La Fria	Venezuela	189	IND	0.0004	0.9986	0.0005	0.0002	0.0003	7.45811	23
301181	Delrex	United States	190	TRJ	0.0009	0.0002	0.0002	0.0023	0.9963	8.35956	NA
301182	Dom Zard	Iran	191	GroupV	0.9994	0.0001	0.0001	0.0002	0.0002	9.51782	20
301183	Erythroceros Hokkaido	Poland	192	TEJ	0.0019	0.0003	0.0003	0.9924	0.0051	8.15153	19
301185	HG 24	Burkina Faso	194	ADMIX	0.1152	0.285	0.3679	0.2298	0.002	NA	NA
301186	IRAT 13	Cote D'Ivoire	195	TRJ	0.0001	0.0002	0.0001	0.0002	0.9994	10.2948	17
301187	JM70	Mali	196	IND	0.0018	0.9902	0.0055	0.0005	0.002	NA	NA
301188	Kaukkyi Ani	Myanmar	197	ADMIX	0.2212	0.0004	0.0002	0.2158	0.5624	5.89358	21
301189	Leah	Bulgaria	198	ADMIX	0.1423	0.0006	0.0866	0.0196	0.7508	9.71692	22
301190	Mojito Colorado	Bolivia	199	TRJ	0.0002	0.0001	0.0001	0.0002	0.9993	6.80287	25
301191	P 737	Pakistan	200	AUS	0.0002	0.0122	0.9871	0.0002	0.0003	8.02731	28
301192	Pate Blanc Mn 1	Cote D'Ivoire	201	ADMIX	0.2147	0.0004	0.0002	0.0015	0.7832	9.34845	24
301193	Pratao	Brazil	202	TRJ	0.0001	0.0001	0.0001	0.0002	0.9995	9.38032	21
301194	Radin Ebos 33	Malaysia	203	IND	0.0002	0.9987	0.0005	0.0003	0.0003	7.87727	22
301195	Razza 77	Italy	204	TEJ	0.0002	0.0001	0.0001	0.8137	0.1859	9.62164	16
301196	Rinaldo Bersani	Italy	205	ADMIX	0.0002	0.0002	0.0001	0.6793	0.3203	9.4767	16
301197	Rojofotsy 738	Madagascar	206	ADMIX	0.0009	0.6278	0.3691	0.0004	0.0018	8.71447	27
301198	Sigadis	Indonesia	207	IND	0.0002	0.9677	0.0316	0.0002	0.0003	8.45343	22.3385
301199	SLO 17	India	208	IND	0.0002	0.9989	0.0004	0.0002	0.0003	7.99967	23
301200	Tchibanga	Gabon	209	IND	0.0001	0.9994	0.0002	0.0001	0.0002	7.4538	25
301201	Thavalu	Sri Lanka	210	AUS	0.0086	0.0036	0.9414	0.0223	0.024	8.15788	24
301202	Tokyo Shino Mochi	Japan	211	ADMIX	0.2032	0.0027	0.0013	0.3231	0.4697	8.92347	0
301204	WC 3397	Jamaica	213	TRJ	0.0002	0.0001	0.0001	0.0529	0.9467	9.40962	13
301205	WC 4419	Honduras	214	TRJ	0.0002	0.0002	0.0002	0.0005	0.9989	9.39707	22
301206	WC 4443	Bolivia	215	TRJ	0.0001	0.0001	0.0001	0.0002	0.9995	8.90891	21.577
301207	Yabani Montakhab 7	Egypt	216	ADMIX	0.0005	0.0002	0.0002	0.4651	0.534	7.00863	18
301208	YRL-1	Australia	217	ADMIX	0.0002	0.0003	0.0002	0.4534	0.5459	9.3689	14
301209	PI 298967-1	Australia	218	ADMIX	0.0004	0.0002	0.0001	0.4436	0.5558	9.46975	13
301210	Nucleoryza	Austria	219	TEJ	0.0002	0.0001	0.0002	0.858	0.1414	9.0154	17
301211	Azerbaidjanica	Azerbaijan	220	TEJ	0.057	0.0002	0.0002	0.9356	0.0069	8.0079	18
301212	Sadri Belyi	Azerbaijan	221	GroupV	0.9316	0.0002	0.0003	0.0673	0.0005	8.3324	16
301213	Paraiba Chines Nova	Brazil	222	IND	0.0001	0.9989	0.0006	0.0002	0.0003	8.06148	20
301215	Karabaschak	Bulgaria	224	TEJ	0.0457	0.0003	0.0009	0.95	0.003	8.12397	17
301216	Biser 1	Bulgaria	225	TEJ	0.0003	0.0002	0.0002	0.8873	0.112	7.94155	14
301218	Riz Local	Burkina Faso	227	ADMIX	0.0004	0.4967	0.5023	0.0002	0.0004	8.33975	25
301219	CA 902/B/2/1	Chad	228	AUS	0.0001	0.0003	0.9994	0.0001	0.0001	8.35846	26
301221	Hunan Early Dwarf No. 3	China	231	IND	0.0001	0.9988	0.0007	0.0002	0.0002	7.75705	23
301222	Shangyu 394	China	232	TEJ	0.0003	0.0002	0.0002	0.9841	0.0152	7.02002	13
301223	Sung Liao 2	China	233	TEJ	0.0001	0.0001	0.0001	0.9996	0.0002	7.2806	13
301224	Aijiaonante	China	234	IND	0.0001	0.9993	0.0003	0.0001	0.0002	8.01336	22
301225	Sze Guen Zim	China	235	IND	0.0001	0.9992	0.0003	0.0002	0.0002	7.92952	23
301226	WC 521	China	236	ADMIX	0.0348	0.0008	0.0011	0.4468	0.5164	7.32357	1
301227	Estrela	Colombia	237	ADMIX	0.0003	0.0029	0.0029	0.5536	0.4402	11.2343	12
301228	WAB 56-104	Cote D'Ivoire	238	TRJ	0.0004	0.0138	0.0023	0.0003	0.9833	9.4973	20
301229	WAB 502-13-4-1	Cote D'Ivoire	239	TRJ	0.0254	0.0027	0.0055	0.0078	0.9586	9.00108	14
301230	WAB 501-11-5-1	Cote D'Ivoire	240	TRJ	0.0248	0.0023	0.0051	0.0089	0.959	9.19694	13
301231	ECIA76-S89-1	Cuba	241	IND	0.0004	0.9819	0.0004	0.0005	0.0169	7.82869	25
301232	27	Dominican Republic	242	TRJ	0.0003	0.0002	0.0001	0.0588	0.9406	8.77847	19
301233	Tropical Rice	Ecuador	243	TEJ	0.0004	0.0002	0.0002	0.8917	0.1075	9.91851	20
301234	Arabi	Egypt	244	ADMIX	0.0179	0.3246	0.0007	0.3848	0.2721	9.57636	22
301235	Sab Ini	Egypt	245	TEJ	0.1192	0.0003	0.0002	0.8792	0.0012	8.17326	19
301237	Desvauxii	Former Soviet Union	247	TEJ	0.0002	0.0001	0.0001	0.9992	0.0004	7.9549	15
301238	Caucasica	Former Soviet Union	248	TEJ	0.0007	0.0003	0.0002	0.9964	0.0024	8.56653	15
301239	Pirinae 69	Former Yugoslavia	249	ADMIX	0.0092	0.5221	0.0028	0.4532	0.0126	8.29759	16
301240	Bulgare	France	250	TEJ	0.0044	0.0002	0.0002	0.9895	0.0056	7.52332	16
301241	H256-76-1-1-1	Argentina	251	ADMIX	0.0008	0.143	0.0006	0.1329	0.7227	8.98682	20
301242	Djimoron	Guinea	252	IND	0.0003	0.8891	0.1102	0.0002	0.0003	10.3418	26
301244	Hon Chim	Hong Kong	254	IND	0.0002	0.9981	0.0012	0.0002	0.0003	8.54785	26
301245	Pai Hok Glutinous	Hong Kong	255	IND	0.0001	0.9993	0.0003	0.0001	0.0002	7.68819	26
301246	Romanica	Hungary	256	TEJ	0.0002	0.0001	0.0001	0.9992	0.0003	8.1721	19
301247	Agusita	Hungary	257	TEJ	0.0003	0.0002	0.0002	0.8497	0.1496	9.78203	18
301248	Tia Bura	Indonesia	258	TRJ	0.0916	0.0003	0.0003	0.004	0.9037	10.0143	24
301249	Sadri Tor Misri	Iran	259	ADMIX	0.0003	0.5429	0.4562	0.0002	0.0004	9.07391	28
301250	NSF-TV 260	Unknown	260	GroupV	0.999	0.0002	0.0002	0.0003	0.0003	9.34381	24
301251	Shim Balte	Iraq	261	AUS	0.0002	0.0006	0.9989	0.0002	0.0002	7.99627	25
301252	Halwa Gose Red	Iraq	262	AUS	0.0004	0.001	0.9974	0.0004	0.0008	8.03885	25
301253	Maratelli	Italy	263	TEJ	0.0001	0.0001	0.0001	0.9996	0.0002	7.8336	15
301254	Baldo	Italy	264	ADMIX	0.0001	0.0001	0.0001	0.6212	0.3784	9.50362	14
301255	Vialone	Italy	265	ADMIX	0.0265	0.0003	0.0003	0.7774	0.1956	8.28482	15
301256	Hiderisirazu	Japan	266	ADMIX	0.1833	0.0002	0.0002	0.6337	0.1825	7.5431	13
301257	Hatsunishiki	Japan	267	TEJ	0.0001	0.0001	0.0001	0.9996	0.0002	7.44114	14
301258	Vavilovi	Kazakhstan	268	TEJ	0.0439	0.0002	0.0002	0.95	0.0057	9.0544	18
301259	Sundensis	Kazakhstan	269	IND	0.0046	0.8187	0.0116	0.161	0.0042	9.58162	16
301260	Osogovka	Macedonia	270	ADMIX	0.0002	0.0001	0.0001	0.6885	0.3111	10.7766	13
301261	M. Blatec	Macedonia	271	ADMIX	0.0002	0.0002	0.0001	0.7802	0.2193	10.1701	15
301262	923	Madagascar	272	ADMIX	0.0057	0.4378	0.191	0.0017	0.3638	12.5489	26
301263	Varyla	Madagascar	273	ADMIX	0.0002	0.0002	0.0001	0.3306	0.6688	9.22092	15
301264	Padi Pagalong	Malaysia	274	TRJ	0.072	0.0006	0.0014	0.0007	0.9253	9.89776	22
301265	Sri Malaysia Dua	Malaysia	275	TEJ	0.0001	0.0001	0.0001	0.9996	0.0002	8.56658	15
301266	Kaukau	Mali	276	AUS	0.0019	0.1094	0.8839	0.0007	0.0042	6.83531	25
301267	Gambiaka Sebela	Mali	277	TEJ	0.0001	0.0001	0.0001	0.9386	0.0611	8.544	17
301268	C1-6-5-3	Mexico	278	ADMIX	0.0006	0.4939	0.0004	0.5045	0.0007	7.76647	15
301269	Kon Suito	Mongolia	279	TEJ	0.0005	0.0002	0.0001	0.9983	0.0009	8.29281	19
301270	Saku	Mongolia	280	ADMIX	0.0001	0.0001	0.0001	0.2868	0.7128	8.52027	18
301271	Patna	Morocco	281	ADMIX	0.0002	0.0001	0.0001	0.743	0.2566	9.46761	16
301272	Triomphe Du Maroc	Morocco	282	TEJ	0.0001	0.0001	0.0001	0.9996	0.0002	7.65239	15
301273	Chibica	Mozambique	283	TEJ	0.0002	0.0001	0.0001	0.8425	0.1572	8.30928	15
301274	IR-44595	Nepal	284	IND	0.0005	0.9144	0.0843	0.0004	0.0005	9.56905	20
301275	Tox 782-20-1	Nigeria	285	TRJ	0.1061	0.0007	0.0013	0.0007	0.8912	9.67985	14
301276	IITA 135	Nigeria	286	TRJ	0.002	0.0896	0.0007	0.0005	0.9072	9.43159	NA
301277	Zerawchanica Karatalski	Poland	287	TEJ	0.001	0.0001	0.0001	0.9983	0.0004	8.11275	15
301278	Italica Carolina	Poland	288	TEJ	0.0007	0.0001	0.0002	0.9981	0.0009	8.89487	20
301279	Lusitano	Portugal	289	TEJ	0.0004	0.0002	0.0002	0.9987	0.0007	8.75247	18
301280	Amposta	Puerto Rico	290	TEJ	0.0001	0.0001	0.0001	0.9995	0.0002	7.16465	14
301281	Toploea 70/76	Romania	291	TEJ	0.0001	0.0001	0.0001	0.9993	0.0003	7.0208	14
301282	Stegaru 65	Romania	292	TEJ	0.0002	0.0001	0.0001	0.9992	0.0004	8.76252	17
301283	TOg 7178	Senegal	293	ADMIX	0.0004	0.4883	0.5108	0.0002	0.0004	8.31884	25
301284	SL 22-613	Sierra Leone	294	ADMIX	0.0005	0.6852	0.1148	0.0006	0.1989	8.38321	16
301286	Dosel	Spain	296	TEJ	0.0002	0.0002	0.0001	0.9523	0.0472	8.31808	16
301287	Bahia	Spain	297	TEJ	0.0002	0.0001	0.0001	0.9374	0.0622	8.42281	16
301288	LD 24	Sri Lanka	298	IND	0.0003	0.8814	0.1177	0.0003	0.0004	7.50081	26
301289	SML 242	Suriname	299	IND	0.0001	0.9993	0.0004	0.0001	0.0002	8.07613	23
301290	Sml Kapuri	Suriname	300	TEJ	0.0009	0.0002	0.0002	0.8505	0.1482	8.10278	19
301291	Melanotrix	Tajikistan	301	ADMIX	0.2954	0.0004	0.0006	0.7014	0.0023	7.3055	15
301292	WIR 3039	Tajikistan	302	ADMIX	0.267	0.0003	0.0002	0.7274	0.0051	7.09514	14
301293	Kihogo	Tanzania	303	TEJ	0.0002	0.0001	0.0001	0.8661	0.1335	8.36971	16
301294	519	Uruguay	304	ADMIX	0.0006	0.5016	0.4968	0.0003	0.0007	7.84437	25
301296	WIR 3764	Uzbekistan	306	TEJ	0.0382	0.0002	0.0003	0.8971	0.0643	7.33776	19
301297	Uzbekskij 2	Uzbekistan	307	TEJ	0.0002	0.0001	0.0001	0.9993	0.0003	7.7673	15
301298	Llanero 501	Venezuela	308	TRJ	0.1651	0.0002	0.0002	0.0002	0.8343	8.68059	NA
301299	Manzano	Zaire	309	TRJ	0.0002	0.0001	0.0001	0.0003	0.9992	9.24641	20
301300	R 101	Zaire	310	TRJ	0.0001	0.0001	0.0001	0.0004	0.9992	10.2241	11
301301	56-122-23	Thailand	311	TEJ	0.0001	0.0001	0.0001	0.9996	0.0002	7.34837	15
301302	Aswina 330	Bangladesh	312	AUS	0.0002	0.001	0.9984	0.0001	0.0002	8.33606	24
301303	BR24	Bangladesh	313	IND	0.0072	0.9455	0.0076	0.0005	0.0392	9.05276	23
301304	CTG 1516	Bangladesh	314	AUS	0.0001	0.0003	0.9994	0.0001	0.0001	8.39252	24
301305	Dawebyan	Myanmar	315	IND	0.0004	0.9079	0.0894	0.0003	0.002	9.06857	24
301306	DD 62	Bangladesh	316	AUS	0.0001	0.0002	0.9994	0.0001	0.0002	7.02032	22
301307	DJ 123	Bangladesh	317	AUS	0.0001	0.0002	0.9995	0.0001	0.0001	8.57592	NA
301308	DJ 24	Bangladesh	318	AUS	0.0001	0.0002	0.9994	0.0001	0.0001	7.28937	25
301310	DM 43	Bangladesh	320	AUS	0.0001	0.0004	0.9991	0.0002	0.0002	7.86983	24
301311	DM 56	Bangladesh	321	AUS	0.0001	0.0003	0.9995	0.0001	0.0001	7.32521	25
301312	DM 59	Bangladesh	322	AUS	0.0001	0.0003	0.9993	0.0001	0.0002	8.44836	26
301313	DNJ 140	Bangladesh	323	AUS	0.0005	0.0016	0.9969	0.0004	0.0006	7.82762	24
301314	DV 123	Bangladesh	324	AUS	0.0001	0.0002	0.9995	0.0001	0.0001	7.28808	25
301315	EMATA A 16-34	Myanmar	325	IND	0.0001	0.9993	0.0003	0.0001	0.0002	8.05172	22
301316	Ghorbhai	Bangladesh	326	AUS	0.0001	0.0009	0.9986	0.0001	0.0002	7.65807	24
301317	Goria	Bangladesh	327	AUS	0.0001	0.0013	0.998	0.0003	0.0003	8.0125	24
301318	Jamir	Bangladesh	328	AUS	0.0001	0.0006	0.9989	0.0001	0.0002	7.45767	24
301319	Kachilon	Bangladesh	329	AUS	0.0001	0.0006	0.9989	0.0002	0.0002	7.69339	24
301320	Khao Pahk Maw	Thailand	330	AUS	0.0741	0.0003	0.8273	0.003	0.0953	9.08008	25
301321	Khao Tot Long 227	Thailand	331	AUS	0.0001	0.0003	0.9993	0.0001	0.0002	8.54679	24
301322	KPF-16	Bangladesh	332	ADMIX	0.0002	0.5633	0.4361	0.0002	0.0003	7.47847	25
301323	Leuang Hawn	Thailand	333	TEJ	0.0001	0.0001	0.0001	0.9995	0.0002	7.05479	14
301324	Lomello	Thailand	334	TEJ	0.0015	0.0003	0.0003	0.9538	0.0441	9.11809	18
301325	Okshitmayin	Myanmar	335	ADMIX	0.0043	0.1273	0.0339	0.2629	0.5716	8.48503	9
301326	Paung Malaung	Myanmar	336	AUS	0.0001	0.0002	0.9995	0.0001	0.0001	8.20706	24
301327	Sabharaj	Bangladesh	337	IND	0.0001	0.9992	0.0004	0.0001	0.0002	7.92223	22
301328	Sitpwa	Myanmar	338	TEJ	0.0001	0.0001	0.0001	0.9997	0.0001	7.51802	17
301329	Yodanya	Myanmar	339	IND	0.0001	0.9991	0.0004	0.0002	0.0002	8.34881	22
301330	Berenj	Afghanistan	340	ADMIX	0.6432	0.19	0.1659	0.0004	0.0005	8.77243	23
301331	Shirkati	Afghanistan	341	AUS	0.0001	0.0002	0.9994	0.0001	0.0001	9.10444	25
301332	Cenit	Argentina	342	TRJ	0.0001	0.0002	0.0001	0.1358	0.8637	8.10995	16
301333	Victoria F.A.	Argentina	343	ADMIX	0.0002	0.0001	0.0001	0.5853	0.4143	9.05993	15
301334	Habiganj Boro 6	Bangladesh	344	ADMIX	0.5305	0.0013	0.2131	0.0026	0.2525	7.09193	20
301335	DZ 193	Bangladesh	345	AUS	0.0001	0.0002	0.9995	0.0001	0.0001	8.37517	23
301336	Karkati 87	Bangladesh	346	AUS	0.0001	0.0002	0.9994	0.0001	0.0001	9.19446	26
301337	Creole	Belize	347	TRJ	0.0001	0.0001	0.0001	0.0002	0.9996	9.33548	22
301338	China 1039	China	348	IND	0.0001	0.9991	0.0004	0.0002	0.0002	8.02842	23
301339	Chang Ch'Sang Hsu Tao	China	349	IND	0.0001	0.9988	0.0005	0.0003	0.0003	6.89763	23
301340	Ligerito	Colombia	350	ADMIX	0.2059	0.0003	0.0002	0.0155	0.778	8.77335	17
301393	Guatemala 1021	Guatemala	352	TRJ	0.0001	0.0002	0.0001	0.0002	0.9994	8.63848	20
301341	ARC 10376	India	353	AUS	0.0001	0.0035	0.9959	0.0002	0.0003	6.0652	24
301342	BALA	India	354	IND	0.0003	0.976	0.0232	0.0002	0.0003	7.20963	23
301343	ASD 1	India	355	TEJ	0.0001	0.0001	0.0001	0.9995	0.0002	7.69685	14
301344	JC 117	India	356	IND	0.0001	0.9992	0.0004	0.0001	0.0002	7.94614	23
301345	9524	India	357	AUS	0.0038	0.1248	0.87	0.0005	0.0009	7.62858	23
301347	Surjamkuhi	India	359	AUS	0.0001	0.0003	0.9994	0.0001	0.0001	8.21608	25
301348	PTB 30	India	360	AUS	0.0001	0.0002	0.9995	0.0001	0.0001	8.86838	24
301350	Edomen Scented	Japan	363	TEJ	0.0001	0.0001	0.0001	0.9996	0.0002	6.60658	NA
301351	Rikuto Norin 21	Japan	364	ADMIX	0.2371	0.0019	0.0006	0.3447	0.4157	7.65315	13
301352	Shirogane	Japan	365	TEJ	0.0002	0.0001	0.0001	0.8047	0.1949	7.86777	14
301353	Kiuki No. 46	Japan	366	TEJ	0.0001	0.0001	0.0001	0.9996	0.0002	7.09928	16
301354	Sanbyang-Daeme	Korea	367	ADMIX	0.1636	0.0007	0.0005	0.333	0.5022	8.49659	0
301355	Deokjeokjodo	Korea	368	TEJ	0.0036	0.0003	0.0003	0.9947	0.0012	6.42772	13
301356	Sathi	Pakistan	369	AUS	0.0001	0.0004	0.9991	0.0001	0.0002	9.05097	24
301357	Coarse	Pakistan	370	AUS	0.0001	0.0004	0.9992	0.0001	0.0001	7.93917	25
301358	Santhi Sufaid	Pakistan	371	AUS	0.0001	0.0006	0.999	0.0001	0.0002	8.41917	24
301359	Sufaid	Pakistan	372	AUS	0.0001	0.0003	0.9994	0.0001	0.0002	8.15952	24
301360	Lambayeque 1	Peru	373	GroupV	0.9994	0.0001	0.0001	0.0001	0.0002	10.3931	22
301396	WC 2810	Ponape Island	375	TRJ	0.0001	0.0001	0.0001	0.0002	0.9995	9.51895	22
301361	Breviaristata	Portugal	376	ADMIX	0.0003	0.0002	0.0002	0.5968	0.4026	10.2431	20
301362	PR 304	Puerto Rico	377	TRJ	0.0001	0.0001	0.0001	0.0002	0.9995	8.8848	22
301363	Kalubala Vee	Sri Lanka	378	AUS	0.0037	0.001	0.9179	0.0018	0.0756	7.91285	22
301364	Wanica	Suriname	379	TRJ	0.0001	0.0001	0.0001	0.0001	0.9996	8.91952	23
301365	Tainan-Iku No. 512	Taiwan	380	TEJ	0.0002	0.0002	0.0001	0.9991	0.0004	6.957	18
301366	325	Taiwan	381	ADMIX	0.163	0.0002	0.0002	0.0423	0.7941	7.69084	22
301367	318	TURKEY	384	TRJ	0.0001	0.0001	0.0001	0.0002	0.9995	8.70385	22
301368	Nira	United States	385	IND	0.0003	0.9967	0.0023	0.0003	0.0004	8.4533	22
301369	Palmyra	United States	386	ADMIX	0.0002	0.0001	0.0001	0.3017	0.698	8.12595	16
301370	M-202	United States	387	ADMIX	0.0002	0.0777	0.0005	0.5189	0.4027	7.98394	10
301371	Nortai	United States	388	ADMIX	0.0003	0.0216	0.0083	0.657	0.3127	7.25843	16
301372	CI 11011	United States	389	ADMIX	0.0002	0.0003	0.0002	0.2195	0.7797	7.79526	17
301373	CI 11026	United States	390	ADMIX	0.0018	0.5081	0.0033	0.0814	0.4054	8.81494	22
301374	Della	United States	391	TRJ	0.0002	0.0002	0.0002	0.024	0.9754	9.83821	21
301375	Edith	United States	392	TRJ	0.0001	0.0001	0.0001	0.0769	0.9227	9.70973	15
301376	La 110	United States	393	IND	0.0012	0.9955	0.0022	0.0004	0.0007	8.05627	26
301377	Lady Wright Seln	United States	394	TRJ	0.0001	0.0001	0.0001	0.1964	0.8032	9.44088	15
301378	OS 6 (WC 10296)	Zaire	395	TRJ	0.0003	0.0002	0.0001	0.0004	0.9991	8.98575	22
301379	Cocodrie	United States	396	TRJ	0.0006	0.0387	0.0074	0.0877	0.8656	9.02586	25
301380	Cybonnet	United States	397	TRJ	0.0013	0.0458	0.0035	0.0976	0.8517	9.13209	22
301399	93-11	China	398	IND	0.0001	0.9988	0.0006	0.0002	0.0003	9.34252	18
301381	Spring	United States	399	TRJ	0.0017	0.0325	0.0062	0.0411	0.9185	8.84952	21
301400	Yang Dao 6	China	400	IND	0.0001	0.9988	0.0006	0.0002	0.0003	9.34378	18
301416	RT0034	United States	616	IND	0.0011	0.9043	0.001	0.0167	0.0769	10.144	24.061
301417	MCR010277	United States	617	ADMIX	0.0005	0.4901	0.0004	0.0219	0.487	8.72853	20.355
301404	Pecos	United States	618	ADMIX	0.0002	0.0002	0.0001	0.4583	0.5412	7.73225	12.978
301405	Rosemont	United States	619	TRJ	0.0003	0.1112	0.0007	0.0608	0.8269	9.14503	20.134
301406	Jasmine85	Philippines	620	IND	0.0002	0.9984	0.0009	0.0002	0.0003	9.74437	14.709
301402	LaGrue	United States	621	TRJ	0.0012	0.0022	0.0015	0.0007	0.9944	9.36144	21.118
301418	Bengal	United States	622	ADMIX	0.0002	0.0006	0.0004	0.4151	0.5837	8.56675	11.339
301407	Shufeng 121-1655	China	623	IND	0.0001	0.9989	0.0005	0.0002	0.0002	9.18752	23.707
301408	Kaybonnet	United States	624	TRJ	0.0008	0.0005	0.0003	0.0554	0.943	9.06872	20.181
301419	Katy	United States	625	TRJ	0.0013	0.0738	0.0018	0.0304	0.8928	9.04428	20.206
301420	C101A51	Philippines	626	IND	0.0002	0.9937	0.0057	0.0002	0.0002	7.58773	24.393
301421	Early	United States	627	ADMIX	0.0008	0.0526	0.0008	0.3638	0.582	9.921	20.075
301409	Jefferson	United States	628	TRJ	0.0005	0.0859	0.0004	0.0729	0.8403	9.63238	17.683
301410	Panda	Italy	629	ADMIX	0.0002	0.0002	0.0001	0.3247	0.6748	9.7649	15.507
301411	Saber	United States	630	ADMIX	0.0003	0.2495	0.0011	0.0393	0.7099	8.78595	17.08
301412	Dragon Eyeball 100	China	631	ADMIX	0.061	0.0003	0.0004	0.5406	0.3977	8.4545	17.349
301413	Francis	United States	632	TRJ	0.0008	0.012	0.0495	0.0316	0.9062	9.2707	20.284
301414	Jing 185-7	China	633	IND	0.0007	0.9578	0.0408	0.0003	0.0004	8.48015	24.095
301415	Rondo (4484-1693)	China	634	IND	0.0004	0.9945	0.0035	0.0005	0.0011	9.47815	23.32
312001	Azucena	Philipppines	635	TRJ	0.0976	0.0005	0.0015	0.0019	0.8985	NA	NA
312002	Sadu Cho	Korea	636	IND	0.0021	0.97	0.0177	0.0011	0.0092	NA	NA
312003	N 22	India	637	AUS	0.0001	0.0003	0.9993	0.0001	0.0002	NA	NA
312004	Moroberekan	Guinea	638	ADMIX	0.2117	0.0004	0.0003	0.0011	0.7865	NA	NA
312005	Nipponbare	Japan	639	TEJ	0.0001	0.0001	0.0001	0.9997	0.0001	NA	NA
312006	Dom Sufid	Iran	640	GroupV	0.9995	0.0001	0.0001	0.0002	0.0002	NA	NA
312007	Tainung 67	Taiwan	641	TEJ	0.0003	0.0231	0.001	0.9753	0.0004	NA	NA
312008	Zhenshan 97B	China	642	IND	0.0008	0.9566	0.0003	0.0411	0.0012	NA	NA
312009	Minghui 63	China	643	IND	0.0013	0.9302	0.0537	0.0045	0.0103	NA	NA
312010	IR64	Philippines	644	IND	0.0008	0.9865	0.0118	0.0004	0.0006	NA	NA
312011	M-202	United States	645	ADMIX	0.0003	0.0776	0.0005	0.5163	0.4053	NA	NA
312012	Swarna	India	646	IND	0.0075	0.9588	0.0301	0.0007	0.0029	NA	NA
312013	Cypress	United States	647	TRJ	0.0006	0.0472	0.0009	0.0914	0.8599	NA	NA
312015	FR13A	India	649	AUS	0.0002	0.1016	0.8978	0.0002	0.0002	NA	NA
312016	Aswina	Bangladesh	650	IND	0.0003	0.8276	0.1717	0.0002	0.0003	NA	NA
312017	Dular	India	651	AUS	0.0001	0.0003	0.9994	0.0001	0.0001	NA	NA
312018	Li-Jiang-Xin-Tuan-Hei-Gu	China	652	ADMIX	0.4813	0.0061	0.004	0.381	0.1276	NA	NA
312020	Pokkali	SriLanka	654	IND	0.0003	0.8542	0.145	0.0002	0.0003	NA	NA
